# Supplementary material for: The aspartate superpathway in gut microbiota-related metabolic pathways mediates immune cell protection against COPD and IPF: a Mendelian randomization analysis
Source: publisher site journal article supplement (doi:10.18632/aging.206250), 2025-05-15
Supplement: Supplementary file [file aging-v17-206250-supplementary-material-SD1.pdf]

SUPPLEMENTARY FIGURE

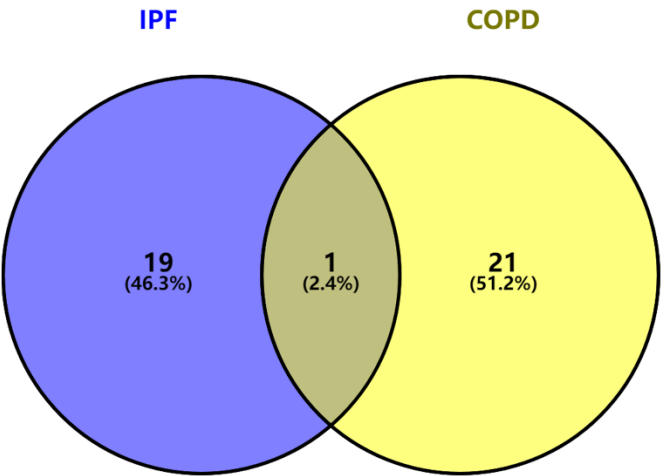

**Supplementary Figure 1. Venn diagram showing the numbers of IPF- and COPD-associated gut microbiota pathways.** The aspartate superpathway (shown by the intersection) is a microbiota metabolic pathway associated with both IPF and COPD. 19 IPF-associated and 21 COPD-associated gut microbiota composition were taken to be intersected.
