# Supplementary material for: The aspartate superpathway in gut microbiota-related metabolic pathways mediates immune cell protection against COPD and IPF: a Mendelian randomization analysis
Source: publisher site journal article supplement (doi:10.18632/aging.206250), 2025-05-15
Supplement: Supplementary file [file aging-v17i5-206250-supplementary-material-SD2.pdf]

## SUPPLEMENTARY TABLES

**Supplementary Table 1. IPF-related gut microbiota and metabolic pathways.**

| id           | name                                                                                                                                     | p-value              |
|--------------|------------------------------------------------------------------------------------------------------------------------------------------|----------------------|
| GCST90027459 | DAPLYSINESYN.PWY..L.lysine.biosynthesis.I                                                                                                | 0.0174982873746744   |
| GCST90027476 | GLYCOGENSYNTH.PWY..glycogen.biosynthesis.I..from.ADP.D.Glucose.                                                                          | 0.0258085976949285   |
| GCST90027520 | PWY0.1338..polymyxin.resistance                                                                                                          | 0.000561305378200455 |
| GCST90027526 | PWY0.781..aspartate.superpathway                                                                                                         | 0.0378528122088573   |
| GCST90027537 | PWY.5022..4.aminobutanoate.degradation.V                                                                                                 | 0.0268849216334508   |
| GCST90027541 | PWY.5101..L.isoleucine.biosynthesis.II                                                                                                   | 0.0381510042823094   |
| GCST90027562 | PWY.5918..superpathway.of.heme.biosynthesis.from.glutamate                                                                               | 0.0321507133378937   |
| GCST90027590 | PWY.6629..superpathway.of.L.tryptophan.biosynthesis                                                                                      | 0.00992156423579139  |
| GCST90027593 | PWY.6690..cinnamate.and.3.hydroxycinnamate.degradation.to.2.oxopent.4.enoate                                                             | 0.00668720180700082  |
| GCST90027609 | PWY.7197..pyrimidine.deoxyribonucleotide.phosphorylation                                                                                 | 0.0482522745688315   |
| GCST90027710 | k_Bacteria.p_Firmicutes.c_Clostridia.o_Clostridiales.f_Lachnospiraceae.g_Coproccoccus                                                    | 0.0448015037701725   |
| GCST90027724 | k_Bacteria.p_Firmicutes.c_Negativicutes.o_Selenomonadales.f_Veillonellaceae.g_Veillonella                                                | 0.0211839781922249   |
| GCST90027751 | k_Bacteria.p_Proteobacteria                                                                                                              | 0.00766392094032009  |
| GCST90027767 | k_Bacteria.p_Bacteroidetes.c_Bacteroidia.o_Bacteroidales.f_Porphyrimonadaceae.g_Parabacteroides.s_Parabacteroides_goldsteinii            | 0.0349290697876317   |
| GCST90027773 | k_Bacteria.p_Bacteroidetes.c_Bacteroidia.o_Bacteroidales.f_Prevotellaceae.g_Paraprevotella.s_Paraprevotella_xylaniphila                  | 0.0248353543722653   |
| GCST90027782 | k_Bacteria.p_Firmicutes.c_Bacilli.o_Lactobacillales.f_Lactobacillaceae.g_Lactobacillus.s_Lactobacillus_elbrueckii                        | 0.0128776814690116   |
| GCST90027803 | k_Bacteria.p_Firmicutes.c_Erysipelotrichia.o_Erysipelotrichales.f_Erysipelotrichaceae.g_Erysipelotrichaceae_noname.s_Eubacterium_biforme | 0.0123723137486221   |
| GCST90027805 | k_Bacteria.p_Firmicutes.c_Erysipelotrichia.o_Erysipelotrichales.f_Erysipelotrichaceae.g_Holdemania.s_Holdemania_unclassified             | 0.0334695199585892   |
| GCST90027822 | k_Bacteria.p_Bacteroidetes.c_Bacteroidia.o_Bacteroidales.f_Bacteroidaceae.g_Bacteroides.s_Bacteroides_clarus                             | 0.0372791341579532   |
| GCST90027850 | k_Bacteria.p_Firmicutes.c_Clostridia.o_Clostridiales.f_Lachnospiraceae.g_Lachnospiraceae_noname.s_Lachnospiraceae_bacterium_3_1_46FAA    | 0.0103334164682713   |

Statistical significance was considered at  $p < 0.05$ .

**Supplementary Table 2. COPD-related gut microbiota and metabolic pathways.**

| <b>id</b>    | <b>name</b>                                                                                                                           | <b>p-value</b>      |
|--------------|---------------------------------------------------------------------------------------------------------------------------------------|---------------------|
| GCST90027454 | COA.PWY..coenzyme.A.biosynthesis.I                                                                                                    | 0.0456156517859008  |
| GCST90027458 | CRNFORCAT.PWY..creatinine.degradation.I                                                                                               | 0.0450799236171167  |
| GCST90027460 | DENOVOPURINE2.PWY..superpathway.of.purine.nucleotides.de.novo.biosynthesis.II                                                         | 0.0260102805544053  |
| GCST90027501 | P42.PWY..incomplete.reductive.TCA.cycle                                                                                               | 0.00164234790594733 |
| GCST90027526 | PWY0.781..aspartate.superpathway                                                                                                      | 0.00485565879440769 |
| GCST90027538 | PWY.5088..L.glutamate.degradation.VIII..to.propanoate.                                                                                | 0.0330992473218536  |
| GCST90027543 | PWY.5121..superpathway.of.geranylgeranyl.diphosphate.biosynthesis.II..via.MEP.                                                        | 0.00763686025662704 |
| GCST90027585 | PWY.6590..superpathway.of.Clostridium.acetobutylicum.acidogenic.fermentation                                                          | 0.0179446292169535  |
| GCST90027632 | PWY_GLYOXYLATE.BYPASS..glyoxylate.cycle                                                                                               | 0.0287543285399453  |
| GCST90027689 | k_Bacteria.p_Actinobacteria.c_Actinobacteria.o_Coriobacteriales.f_Coriobacteriaceae.g_Adlercreutzia                                   | 0.0346146070242656  |
| GCST90027703 | k_Bacteria.p_Firmicutes.c_Bacilli.o_Lactobacillales.f_Streptococcaceae.g_Streptococcus                                                | 0.0348109428077718  |
| GCST90027705 | k_Bacteria.p_Firmicutes.c_Clostridia.o_Clostridiales.f_Clostridiales_noname.g_Flavonifractor                                          | 0.0110893986035683  |
| GCST90027758 | k_Bacteria.p_Actinobacteria.c_Actinobacteria.o_Coriobacteriales.f_Coriobacteriaceae.g_Adlercreutzia.s_Adlercreutzia_equolifaciens     | 0.0348423554504129  |
| GCST90027774 | k_Bacteria.p_Bacteroidetes.c_Bacteroidia.o_Bacteroidales.f_Prevotellaceae.g_Prevotella.s_Prevotella_copri                             | 0.0275518765301815  |
| GCST90027790 | k_Bacteria.p_Firmicutes.c_Clostridia.o_Clostridiales.f_Eubacteriaceae.g_Eubacterium.s_Eubacterium_eligens                             | 0.0224288748777411  |
| GCST90027808 | k_Bacteria.p_Firmicutes.c_Negativicutes.o_Selenomonadales.f_Veillonellaceae.g_Veillonella.s_Veillonella_unclassified                  | 0.0469163857617631  |
| GCST90027817 | k_Bacteria.p_Proteobacteria.c_Gammaproteobacteria.o_Enterobacteriales.f_Enterobacteriaceae.g_Escherichia.s_Escherichia_unclassified   | 0.0374646593397856  |
| GCST90027824 | k_Bacteria.p_Bacteroidetes.c_Bacteroidia.o_Bacteroidales.f_Bacteroidaceae.g_Bacteroides.s_Bacteroides_dorei                           | 0.0116210412375593  |
| GCST90027842 | k_Bacteria.p_Firmicutes.c_Clostridia.o_Clostridiales.f_Lachnospiraceae.g_Butyrvibrio.s_Butyrvibrio_crossotus                          | 0.0411945185417917  |
| GCST90027845 | k_Bacteria.p_Firmicutes.c_Clostridia.o_Clostridiales.f_Lachnospiraceae.g_Coprococcus.s_Coprococcus_sp_ART55_1                         | 0.0185148218336091  |
| GCST90027848 | k_Bacteria.p_Firmicutes.c_Clostridia.o_Clostridiales.f_Lachnospiraceae.g_Dorea.s_Dorea_unclassified                                   | 0.0179394856149212  |
| GCST90027852 | k_Bacteria.p_Firmicutes.c_Clostridia.o_Clostridiales.f_Lachnospiraceae.g_Lachnospiraceae_noname.s_Lachnospiraceae_bacterium_7_1_58FAA | 0.021748490257721   |

Statistical significance was considered at  $p < 0.05$ .

**Supplementary Table 3. Major components of the aspartate superpathway.**

---

| <b>MetaCyc-Main compound</b>                     |
|--------------------------------------------------|
| oxaloacetate                                     |
| L-aspartate                                      |
| 2-iminosuccinate                                 |
| quinolinate                                      |
| $\beta$ -nicotinate D-ribonucleotide             |
| nicotinate adenine dinucleotide                  |
| NAD                                              |
| L-aspartyl-4-phosphate                           |
| L-aspartate 4-semialdehyde                       |
| (2S,4S)-4-hydroxy-2,3,4,5-tetrahydrodipicolinate |
| (S)-2,3,4,5-tetrahydrodipicolinate               |
| N-succinyl-2-amino-6-ketopimelate                |
| N-succinyl-L,L-2,6-diaminopimelate               |
| L,L-diaminopimelate                              |
| meso-diaminopimelate                             |
| L-lysine                                         |
| L-homoserine                                     |
| L-cysteine                                       |
| O-succinyl-L-homoserine                          |
| O-phospho-L-homoserine                           |
| L-threonine                                      |
| L-cystathionine                                  |
| L-homocysteine                                   |
| L-methionine                                     |
| S-adenosyl-L-methionine                          |

---

Retrieved from <https://biocyc.org/>.
